# Supplementary material
Source: PubMed Central journal article supplement (PMC5368591)
Supplement: mmc1.pdf [file mmc1.pdf]

YMTHE, Volume 25

## **Supplemental Information**

### **CRISPR/Cas9-Mediated Genome Editing**

#### **as a Therapeutic Approach for Leber**

#### **Congenital Amaurosis 10**

**Guo-Xiang Ruan, Elizabeth Barry, Dan Yu, Michael Lukason, Seng H. Cheng, and Abraham Scaria**

## Supplementary Figure S1

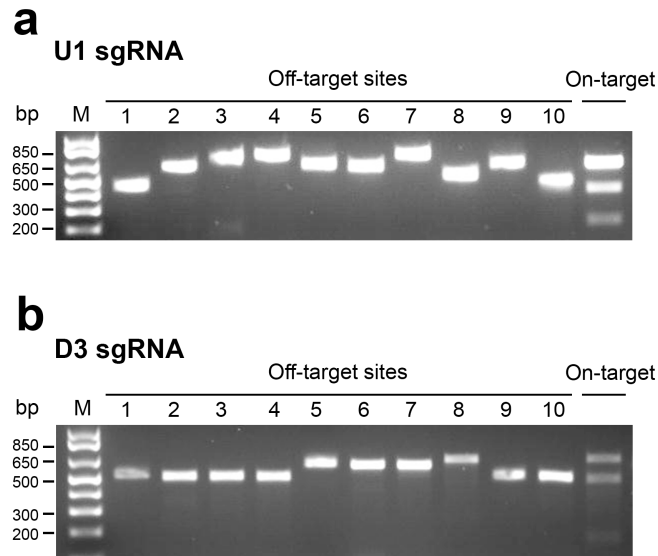

**Supplementary Figure S1 T7E1 assay for ten potential off-target sites for the U1 and D3 sgRNAs.** Human 293FT cells were transfected with either pSpCas9(BBU)-U1 sgRNA or pSpCas9(BBD)-D3 sgRNA. The DNA fragment including the on- and off-target sequence was amplified using primers listed in Supplementary Table S5, and then subjected to T7E1 digestion. In the on-target lanes, the two lower bands correspond to DNA bands cleaved by mismatch-sensitive T7E1. M, 1-kb DNA ladder.

## Supplementary Figure S2

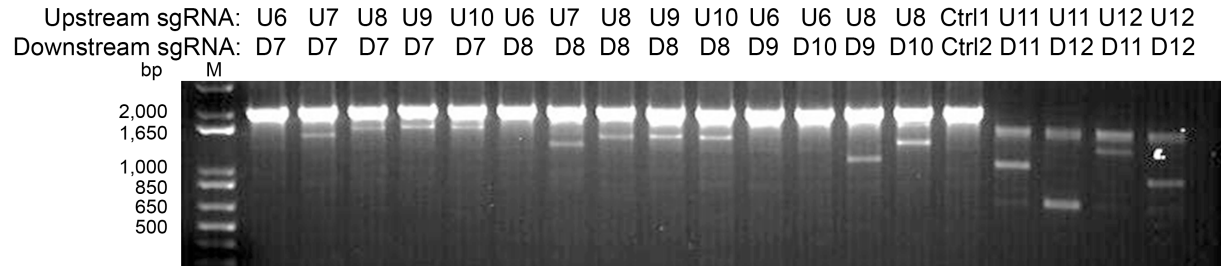

**Supplementary Figure S2 Screening of sgRNA pairs for targeted genomic deletion of intron 25 of the mouse *Cep290* gene.** Mouse Neuro-2a cells were transfected with the indicated pairs of sgRNA and SpCas9 using NeuroMag (OZ Biosciences). Primers were designed to bind outside of the regions to be deleted. The upper bands represent PCR products amplified from intron 25 of wild-type *Cep290*, whereas the lower bands represent PCR products amplified from the *Cep290* allele following genomic deletion. M, 1-kb DNA ladder.

**Supplementary Table S1 – Protospacer sequences for the sgRNAs used in the current study**

| <b>sgRNA name</b> | <b>Protospacer sequence</b> |
|-------------------|-----------------------------|
| sgRNA for HDR     | AAGACACTGCCAATAGGGAT        |
| U1                | GGCGGGTGGATCACGAGTTC        |
| D1                | AAAGCTACCGGTTACCTGAA        |
| D2                | TCATTCTTGTGGCAGTAAGG        |
| D3                | GGAGTCACATGGGAGTCACA        |
| aU1               | TTTAACGTTATCATTTCCTCA       |
| aU2               | AGTTTCATTCTGTCACCCAGG       |
| aU3               | AAAAATTAGCCGGGCATGATG       |
| aD1               | TGTAAGACTGGAGATAGAGAC       |
| aD2               | CTTTTGACAGTTTTTAAGGCG       |
| Control sgRNA 1   | GCACTACCAGAGCTAACTCA        |
| Control sgRNA 2   | GTGCGAATACGCCACGCGAT        |
| U6                | CTTAAAATCTCTAATACTGA        |
| U7                | AGAATAGCCTTGAAATACTG        |
| U8                | TATACAGTCTAGGCTAGCAA        |
| U9                | GCCTAGACTGTATACGAATG        |
| U10               | GCCTCATTCGTATACAGTCT        |
| U11               | GCATAAGGACTAAAGACCTA        |
| U12               | ATAACAACCTTCCATCCAAA        |
| D7                | GCTCCTACTTGCCTGCATCG        |
| D8                | ATTGCTTTCAGTACAGGCGA        |
| D9                | AACACACATCCACATCCACA        |
| D10               | GTTAGGTTAGGAAGAATCGA        |
| D11               | GGTAGTGGTTGAACTCACAA        |
| D12               | ACTGAAGTAATCTTTCACAG        |

**Supplementary Table S2 – Primer sequences**

| <b>Name</b>                               | <b>Sequence</b>                                           |
|-------------------------------------------|-----------------------------------------------------------|
| <i>CEP290</i> Intron 26_F                 | GGTCCCTGGCTTTTGTTCCT                                      |
| <i>CEP290</i> Intron 26_R                 | CAGGAGGCTGAGGGTGTTTT                                      |
| <i>CEP290</i> Intron 26 sequencing primer | AGTAGAGATGGGGTTTCACC                                      |
| Wild-type <i>CEP290</i> _F                | TGACTGCTAAGTACAGGGACATCTTG                                |
| Wild-type <i>CEP290</i> _R                | AGGAGATGTTTTCACACTCCAGGT                                  |
| Mutant <i>CEP290</i> _F                   | CTGGCCCCAGTTGTAATTTGTGA                                   |
| Mutant <i>CEP290</i> _R                   | CTGTTCCCAGGCTTGTTCAATAGT                                  |
| <i>PPIA</i> _F                            | TTCATCTGCACTGCCAAGAC                                      |
| <i>PPIA</i> _R                            | TCGAGTTGTCCACAGTCAGC                                      |
| BbsI mutation_Top                         | GGGAGGATTGGGAAGAGAATAGCAGGCATGCTG                         |
| BbsI mutation_Bottom                      | CAGCATGCCTGCTATTCTCTTCCCAATCCTCCC                         |
| pSpCas9(BBD)_F                            | ATAACATGTGGTCTCACTCTAGAGGCATGTGAGGGCC<br>TATTCCC          |
| pSpCas9(BBD)_R                            | TATGGTACCGGTCTCATAGAGCCATTTGTCTGCAGA                      |
| m <i>Cep290</i> Intron 25_F               | CCCCTCGCCTGTACTGAAAG                                      |
| m <i>Cep290</i> Intron 25_R               | GCACATCATCTGAGGCAGGT                                      |
| BGH_P                                     | 6-FAM-TCCCCCGTGCCTTCCTTGACC-TAMRA                         |
| BGH_F                                     | TCTAGTTGCCAGCCATCTGTTGT                                   |
| BGH_R                                     | TGGGAGTGGCACCTTCCA                                        |
| SV40_P                                    | 6-FAM-<br>AGCATTTTTTTCCTGCATTCTAGTTGTGGTTTGTGTC-<br>TAMRA |
| SV40_F                                    | AGCAATAGCATCACAAATTTACAA                                  |
| SV40_R                                    | GCAGACATGATAAGATACATTGATGAGTT                             |

### Supplementary Table S3 – Other sequences

ssODN for HDR with c.2991+1655A>G (LCA10 mutation) and c.2991+1666C>G (PAM mutation) underlined:

CCACCCGCTCGGCCTCCTAAAGTGCTGGGATTACAGATGTGAGCCACCGCACCT  
GGCCCCAGTTGTAATTGTGAGTATCTCATACGTATCCCTATTGGCAGTGTCTTAGT  
TTTATTTTTTATTATCTTTATTGTGGCAGCCATTATTCCTGTCTCTATCTC

U6 promoter-BbsI:BbsI-sgRNA scaffold for constructing pSpCas9(BB):

CACATGTGAGGGCCTATTTCCCATGATTCCTTCATATTTGCATATACGATACAAGG  
CTGTTAGAGAGATAATTGGAATTAATTTGACTGTAAACACAAAGATATTAGTACA  
AAATACGTGACGTAGAAAGTAATAATTTCTTGGGTAGTTTGCAGTTTTAAAATTA  
TGTTTTAAAATGGACTATCATATGCTTACCGTAACTTGAAAGTATTTTCGATTTCTT  
GGCTTTATATATCTTGTGGAAAGGACGAAACACCGGGTCTTCGAGAAGACCTGTT  
TTAGAGCTAGAAATAGCAAGTTAAAATAAGGCTAGTCCGTTATCAACTTGAAAA  
AGTGGCACCGAGTCGGTGCTTTTTTGTTTTAGAGCTAGAAATAGCAAGTTAAAAT  
AAGGCTAGTCCGTTTTTAGCGCGTGCGCCAATTCTGCAGACAAATGGCTCTAGAG  
GTACCC

minCMV promoter sequence:

GACTCACGGGGATTTCCAAGTCTCCACCCCATGACGTCAATGGGAGTTTGTTTTG  
GCACCAAATCAACGGGACTTTCCAAAATGTCGTAACAACCTCCGCCCCATTGACG  
CAAATGGGCGGTAGGCGTGTACGGTGGGAGGTCTATATAAGCAGAGCTCGTTTAG  
TGAACCGTCAGATC

U1 sgRNA recognition sequence (U1T):

GGCGGGTGGATCACGAGTTCAGG

D3 sgRNA recognition sequence (D3T):

GGAGTCACATGGGAGTCACAGGG

**Supplementary Table S4 – Top 10 off-target cleavage sites for the U1 and D3 sgRNAs**

|             | #     | Sequence             | PAM | Score  | Chromosome | Strand | Position  |
|-------------|-------|----------------------|-----|--------|------------|--------|-----------|
| U1<br>sgRNA | ON    | GGCGGGTGGATCACGAGTTC | AGG | 100.00 | chr12      | 1      | 88101266  |
|             | OFF1  | GGTGGGTGGATCATGAGTTC | AGG | 1.37   | chr16      | 1      | 81828887  |
|             | OFF2  | GCTGGGTAGACCACGAGTTC | TAG | 0.88   | chr3       | 1      | 127784508 |
|             | OFF3  | GGTGAGTGGATCACGAGGTC | AGG | 0.74   | chr1       | 1      | 13910293  |
|             | OFF4  | GGCTGGTGGTTCACGAGGTC | AGG | 0.66   | chr22      | 1      | 48558795  |
|             | OFF5  | GGTGGCTGGGTCACGAGTTG | GGG | 0.47   | chr17      | -1     | 79716222  |
|             | OFF6  | GATGTGTGGATCACAAGTTC | TAG | 0.46   | chr5       | 1      | 74778050  |
|             | OFF7  | GACAGGTGGGTCACAAGTTC | CAG | 0.45   | chr2       | -1     | 96950573  |
|             | OFF8  | GGGTGGTGGTTCACAAGTTC | TAG | 0.43   | chr10      | 1      | 23896895  |
|             | OFF9  | TGCGGCTGGCTCCCGAGTTC | TGG | 0.37   | chr3       | -1     | 37641510  |
|             | OFF10 | GGCAGGTGGATCACAAGTAC | AGG | 0.32   | chr7       | 1      | 64273295  |
| D3<br>sgRNA | ON    | GGAGTCACATGGGAGTCACA | GGG | 100.00 | chr12      | 1      | 88101036  |
|             | OFF1  | GCAGTGACATGGGAGTCACA | TGG | 3.64   | chr14      | -1     | 97826379  |
|             | OFF2  | GCAGCCACAGGGGAGTCACA | CAG | 2.64   | chr16      | 1      | 5027699   |
|             | OFF3  | GGAGACATAGGGGAGTCACA | GGG | 2.38   | chr2       | 1      | 240564643 |
|             | OFF4  | GCAGGCTCATGGGAGTCACA | AAG | 1.77   | chr9       | 1      | 97605919  |
|             | OFF5  | TTAGTCACATGGGAGTCAGA | CAG | 1.41   | chr5       | 1      | 66775081  |
|             | OFF6  | GTCCCACATGGGAGTCACA  | GAG | 1.33   | chr21      | -1     | 45971854  |
|             | OFF7  | TTAGTCTCAAGGGAGTCACA | TGG | 1.01   | chr2       | -1     | 98389517  |
|             | OFF8  | GAACTCAACTGGGAGTCACA | AAG | 0.93   | chr4       | 1      | 116584817 |
|             | OFF9  | CCAGTGAGATGGGAGTCACA | GAG | 0.92   | chr2       | 1      | 180622519 |
|             | OFF10 | GGATTCTGAAGGGAGTCACA | AAG | 0.91   | chr6       | 1      | 52106176  |

**Supplementary Table S5 – Primer sequences used to amplify the on- and off-target sites for the U1 and D3 sgRNAs**

|             | #     | Forward primer                        | Reverse primer                        |
|-------------|-------|---------------------------------------|---------------------------------------|
| U1<br>sgRNA | ON    | GGAGTCACATGGGAGTCACAG                 | GCACGATCTCGGCTTAACGC                  |
|             | OFF1  | AGAGGGGGCAGTCCTTGTC                   | CAGTTTTGATCAGCGAGTCCTTGC              |
|             | OFF2  | GAAAAGCTCCCCAGTGGCTC                  | GCAATGCGAAGTTTCTGGAAGGC               |
|             | OFF3  | GGGCAGAAGGCAAATGGGGA                  | CAAATGTTGAGGCTCATGGAGGC               |
|             | OFF4  | CCCTCATGTAGCAGTGAGAGGGA               | CGCTCTTTAATGTCTGTGCGACC               |
|             | OFF5  | CCAGGAGGCCCATGGTAAGA                  | GACAACGAGGATTTATACCCAGC               |
|             | OFF6  | ACACATACAGACGCTTAGGAAAAGAAA<br>GGC    | AGCAGACTCCAGAACACTACCTAC              |
|             | OFF7  | GCCCCACTGTTCCCCATTAC                  | TCACCAGCGATCACAGGTCC                  |
|             | OFF8  | CAGCCAAACTTGGATGACACTTGC              | GCTGACAAGGGCATTTCGAATCTG              |
|             | OFF9  | GTGAGGGATCTAGATTGTGCCG                | AGAGCTGGCCACGGGAAAAG                  |
|             | OFF10 | TAAGAGGCATACACTGTCCACAGG              | GTTGGCTACGGTTAGGTGAGTAAG              |
| D3<br>sgRNA | ON    | CCTGGCCCCAGTTGTAATTGTG                | GCTTGAACCTCTGTGCCAAACAGG              |
|             | OFF1  | GCAACCTTGCTGAAATCCTCTTATGCAT<br>TTTGT | CTTTGATGCCGAAACTAGAAAAGAAA<br>CTGTGAG |
|             | OFF2  | TGGACTAGCCCCTGAACGTG                  | TGTGGCCCCTCTAACTGCAG                  |
|             | OFF3  | CTGCGCATCAGACCACATGGA                 | CTATGTGACCTTAAGTTGGGGTGC              |
|             | OFF4  | GAATTGGTAGATCTCCCCATTCCC              | TGGGGCTAAGCAGCCTTGG                   |
|             | OFF5  | GGTTATGTGCCTAGGCGTTATCAG              | GGTGTAGGGCTGGAATTCATCCTT              |
|             | OFF6  | CTGCGTCTCGCTCCAGTTT                   | TGACCACACCGTGGCTCAGA                  |
|             | OFF7  | ACCAGTTATAGAAGACAGGCAGGG              | GGTTCTGGAGGGAATACTGTGG                |
|             | OFF8  | CACAGGTCTCCTAGATTGCTGATG              | CTTGCACATCACATCATAAAGTGAGCA<br>CTG    |
|             | OFF9  | GACAAACCTTGTATCCGGTGAGC               | CTTCAGGCAGACAACACTTCTACC              |
|             | OFF10 | CCTTCTCAGCTATGTGGAGGAAAC              | AGGCAGTTCATGTGCAATGGGC                |
